# Supplementary material
Source: Royal Society of Chemistry journal article supplement (doi:10.1039/d6cc02717b)
Supplement: d6cc02717b1.pdf [file d6cc02717b1.pdf]

## Supporting Information

### **Electrodeposited Ni<sub>3</sub>Fe alloy on carbon cloth for efficient oxygen evolution**

Chenyu Shi<sup>a</sup>, Junjun Zhang<sup>a\*</sup>, Jie Yuan<sup>c</sup>, Yizhu Lei<sup>c\*</sup>, Pengfei Zhang<sup>a,b\*</sup>

<sup>a</sup>State Key Laboratory of High-efficiency Utilization of Coal and Green Chemical Engineering, College of Chemistry & Chemical Engineering, Ningxia University, Yinchuan, 750021, Ningxia, China. E-mail: zhangjj089@nxu.edu.cn  
pfzhang@nxu.edu.cn

<sup>b</sup>School of Chemistry and Chemical Engineering, Shanghai Jiao Tong University, Shanghai, 200240, China. E-mail: chemistryzpf@sjtu.edu.cn

<sup>c</sup>School of Chemistry and Materials Engineering, Liupanshui Normal University, Liupanshui, 553004, Guizhou, China E-mail: yzleiabc@lpssy.edu.cn

## 1. Experimental Section:

### 1.1 Materials

### 1.2 Preparation of Ni<sub>3</sub>Fe/CC, Ni<sub>3</sub>Mn/CC and Ni<sub>3</sub>Co/CC electrodes

### 1.3 Preparation of RuO<sub>2</sub> electrode

### 1.4 Material characterizations

### 1.5 Electrochemical characterizations

## 2. Supplementary Figures:

**Fig S1.** SEM images of the (a) Ni<sub>3</sub>Fe/CC sample and (b) CC substrate.

**Fig S2** XRD spectra of Ni<sub>3</sub>Fe samples on (a) Ti and (b) Cu substrates.

**Fig S3.** Elemental mapping image of Ni<sub>3</sub>Fe/CC.

**Fig S4.** (a) LSV curves and (b) EIS of Ni<sub>3</sub>Fe sample on CC substrate.

**Fig S5.** (a) LSV curves and (b) EIS of Ni<sub>3</sub>Fe sample on Ti substrate.

**Fig S6.** (a) LSV curves and (b) EIS of Ni<sub>3</sub>Fe sample on Cu substrate.

**Fig S7.** XRD patterns of Ni<sub>3</sub>Fe/CC samples prepared with different electrodeposition times.

**Fig S8.** Overpotentials of Ni<sub>3</sub>Fe/CC, Ni<sub>3</sub>Mn/CC, Ni<sub>3</sub>Co/CC, Ni/CC, CC and RuO<sub>2</sub> electrodes at current densities of (a) 50 mA·cm<sup>-2</sup> and (b) 100 mA·cm<sup>-2</sup>.

**Fig S9.** Schematic of the equivalent circuit used for electrochemical impedance spectroscopy.

**Fig S10.** The Nyquist plots of (a) Ni<sub>3</sub>Mn/CC, (b) Ni<sub>3</sub>Co/CC, (c) Ni/CC, (d) CC and (e) RuO<sub>2</sub> electrodes at various potentials.

**Fig S11.** Bode phase angle plots of (a) Ni<sub>3</sub>Mn/CC, (b) Ni<sub>3</sub>Co/CC, (c) Ni/CC, (d) CC and (e) RuO<sub>2</sub> electrodes at various potentials.

**Fig S12.** CV curves of Ni<sub>3</sub>Fe/CC samples at different scan rates from 20 to 100 mV s<sup>-1</sup> in (a) 1 M KOH and (b) 1 M KOH + 0.5 M NaCl electrolytes.

**Fig S13.** Bode phase angle plots of Ni<sub>3</sub>Fe/CC sample in 1 M KOH + 0.5 M NaCl electrolytes.

**Fig S14.** EIS of Ni<sub>3</sub>Fe/CC samples in different Cl<sup>-</sup> concentrations (0.2, 0.4, 0.6, 0.8 M).

**Fig S15.** XRD patterns of the Ni<sub>3</sub>Fe/CC before and after 500 h stability test.

**Fig S16.** SEM image of Ni<sub>3</sub>Fe/CC after 500 h stability test.

**Fig S17.** HR-TEM images and elemental mapping images of Ni, Fe and O in Ni<sub>3</sub>Fe/CC after OER.

**Fig S18** The XPS spectra of Ni<sub>3</sub>Fe/CC before and after OER.

## 3. Supplementary Table

## 4. References

# 1 Experimental Section

## 1.1 Materials

Anhydrous iron chloride ( $\text{FeCl}_3$ ), anhydrous cobalt chloride ( $\text{CoCl}_2$ ), anhydrous manganese chloride ( $\text{MnCl}_2$ ), nickel chloride hexahydrate ( $\text{NiCl}_2 \cdot 6\text{H}_2\text{O}$ ), sodium chloride ( $\text{NaCl}$ ), and Nafion (5 wt%) were purchased from Aladdin Group Chemical Reagent Co., Ltd. Milli-Q ultrapure water was used throughout all experiments. All chemicals were of analytical grade and used as received without further purification.

## 1.2 Synthesis of NiM/CC

### Synthesis of $\text{Ni}_3\text{Fe}/\text{CC}$

First, 15 mmol of nickel chloride hexahydrate ( $\text{NiCl}_2 \cdot 6\text{H}_2\text{O}$ ), 5 mmol of anhydrous iron chloride ( $\text{FeCl}_3$ ), and 10 mmol of sodium chloride ( $\text{NaCl}$ ) were dissolved in 100 mL of deionized water. The mixture was continuously stirred for 30 minutes to achieve homogeneous mixing, forming the precursor electrolyte.

A standard three-electrode system was used for electrodeposition: the pretreated carbon cloth (CC) served as the working electrode, a 1 cm  $\times$  1 cm platinum sheet serving as the counter electrode, and an Ag/AgCl electrode as the reference electrode. Electrodeposition was conducted at room temperature with a constant current density of  $-100 \text{ mA} \cdot \text{cm}^{-2}$  for 200 s, 400 s, and 600 s, and the as-prepared samples were denoted as  $\text{Ni}_3\text{Fe}$  200s,  $\text{Ni}_3\text{Fe}$  400s, and  $\text{Ni}_3\text{Fe}$  600s, respectively. After deposition, the working electrode was immediately removed, rinsed with deionized water for 5 seconds, and then dried in an oven at  $60^\circ\text{C}$  for 6 hours. Finally, the  $\text{Ni}_3\text{Fe}/\text{CC}$  electrocatalysts were successfully obtained.

### Synthesis of $\text{Ni}_3\text{Mn}/\text{CC}$

Anhydrous ferric chloride ( $\text{FeCl}_3$ ) was replaced with anhydrous manganese chloride ( $\text{MnCl}_2$ ), while all other synthetic parameters and procedures remained identical to those for  $\text{Ni}_3\text{Fe}/\text{CC}$ .

### Synthesis of $\text{Ni}_3\text{Co}/\text{CC}$

Anhydrous ferric chloride ( $\text{FeCl}_3$ ) was replaced with anhydrous cobalt chloride ( $\text{CoCl}_2$ ), while all other synthetic parameters and procedures remained identical to those for  $\text{Ni}_3\text{Fe}/\text{CC}$ .

synthesis of Ni/CC

The synthetic protocol was identical to that of Ni<sub>3</sub>Fe/CC except for the removal of FeCl<sub>3</sub>. Specifically, 15 mmol of NiCl<sub>2</sub>·6H<sub>2</sub>O and 10 mmol of NaCl were dissolved in 100 mL of deionized water, followed by the same stirring, electrodeposition, rinsing, and drying processes.

### 1.3 Synthesis of RuO<sub>2</sub>

5 mg of RuO<sub>2</sub> powder was dispersed in a mixed solution containing 500 μL deionized water, 480 μL ethanol and 20 μL Nafion solution. The mixture was subjected to ultrasonic treatment for 30 min to form a homogeneous catalyst ink. The obtained ink was uniformly coated onto the pre-treated carbon cloth (CC), and naturally dried at ambient temperature prior to subsequent storage.

### 1.4 Material characterizations

The X-ray diffraction (XRD) patterns were recorded on a Bruker D8 Advance X-ray diffractometer with Cu-Kα radiation ( $\lambda = 1.5418 \text{ \AA}$ ) at a scan rate of  $6^\circ \text{ min}^{-1}$ . The SEM measurements were performed on a field-emission scanning electron microscope (FESEM, JSM-7610F, 10 kV). The TEM and HRTEM measurements were taken with a JEOL JEM-F200 microscope. The samples were prepared by dropping an ethanol dispersion of the samples onto carbon-coated copper TEM grids with pipettes and dried under ambient conditions. The X-ray photoelectron spectroscopy (XPS) measurements were conducted on a Kratos Axis Ultra DLD spectrometer. Raman measurements were performed using a JY HR800 Raman spectrometer.

### 1.5 Electrochemical characterizations

Electrochemical performance tests were performed at room temperature using an electrochemical workstation (DH7000C, Donghua, China). A three-electrode system was used, where Ni<sub>3</sub>Fe/CC served as the working electrode, a graphite rod serving as the counter electrode, and a standard Hg/HgO electrode as the reference electrode. A 1.0 M KOH solution was employed as the electrolyte.

All recorded potentials were converted to the reversible hydrogen electrode (RHE) scale according to the equation:  $E_{\text{RHE}} = E_{\text{Hg/HgO}} + 0.059 \text{ pH} + 0.098 \text{ V}$ . All polarization curves were measured at a scan rate of  $10 \text{ mV s}^{-1}$  and corrected with *iR* compensation. The solution resistance (*R<sub>s</sub>*) was determined from the high-frequency intercept of Nyquist plots. The *iR*-corrected potential was calculated as  $E_{\text{corrected}} = E_{\text{measured}} - i \cdot R_{\text{s}}$ ,

where  $E_{\text{corrected}}$  and  $E_{\text{measured}}$  are the  $iR$ -compensated and experimentally measured potentials, respectively, and  $R_s$  is the uncompensated solution resistance. Before electrochemical testing, 20 cyclic voltammetry (CV) cycles were conducted between 0.5 and 1.2 V vs. Hg/HgO at  $10 \text{ mV s}^{-1}$  to stabilize the electrode surface. Linear sweep voltammetry (LSV) was measured over the range of 0-1.2 V vs. Hg/HgO. Electrochemical impedance spectroscopy (EIS) was carried out over a frequency range from 100 kHz to 0.1 Hz, and operando EIS tests were performed at various applied potentials in the range of 0.50–0.80 V vs. Hg/HgO.

The overpotential ( $\eta$ ) was calculated by  $\eta = E_{\text{RHE}} - 1.23$ . Tafel plots were derived from the  $iR$ -corrected polarization curves by plotting overpotential versus logarithmic current density, and the Tafel slope was obtained by fitting the linear region according to  $\eta = b \log(j) + a$ . Long-term durability was evaluated by chronopotentiometric measurements under constant current density. All these electrochemical measurements were carried out at ambient temperature.

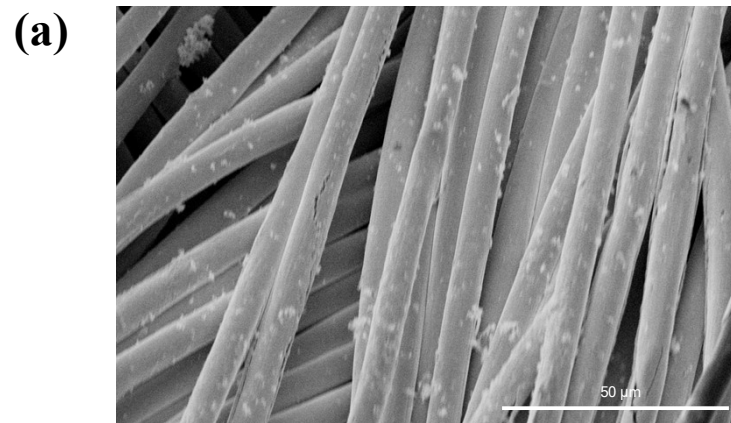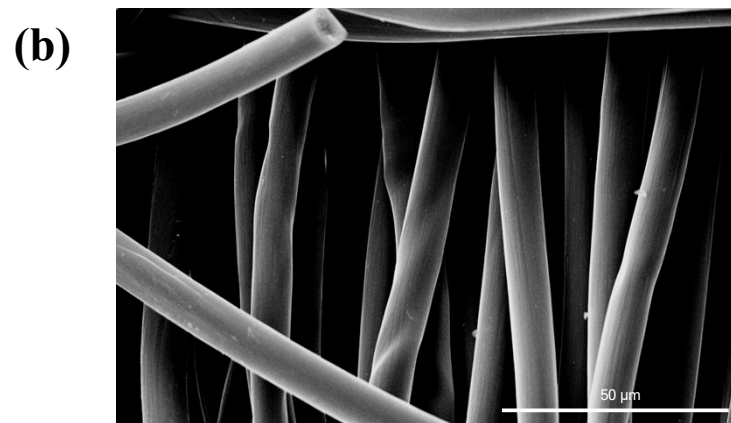

**Fig S1.** SEM images of the (a) Ni<sub>3</sub>Fe/CC sample and (b) CC substrate.

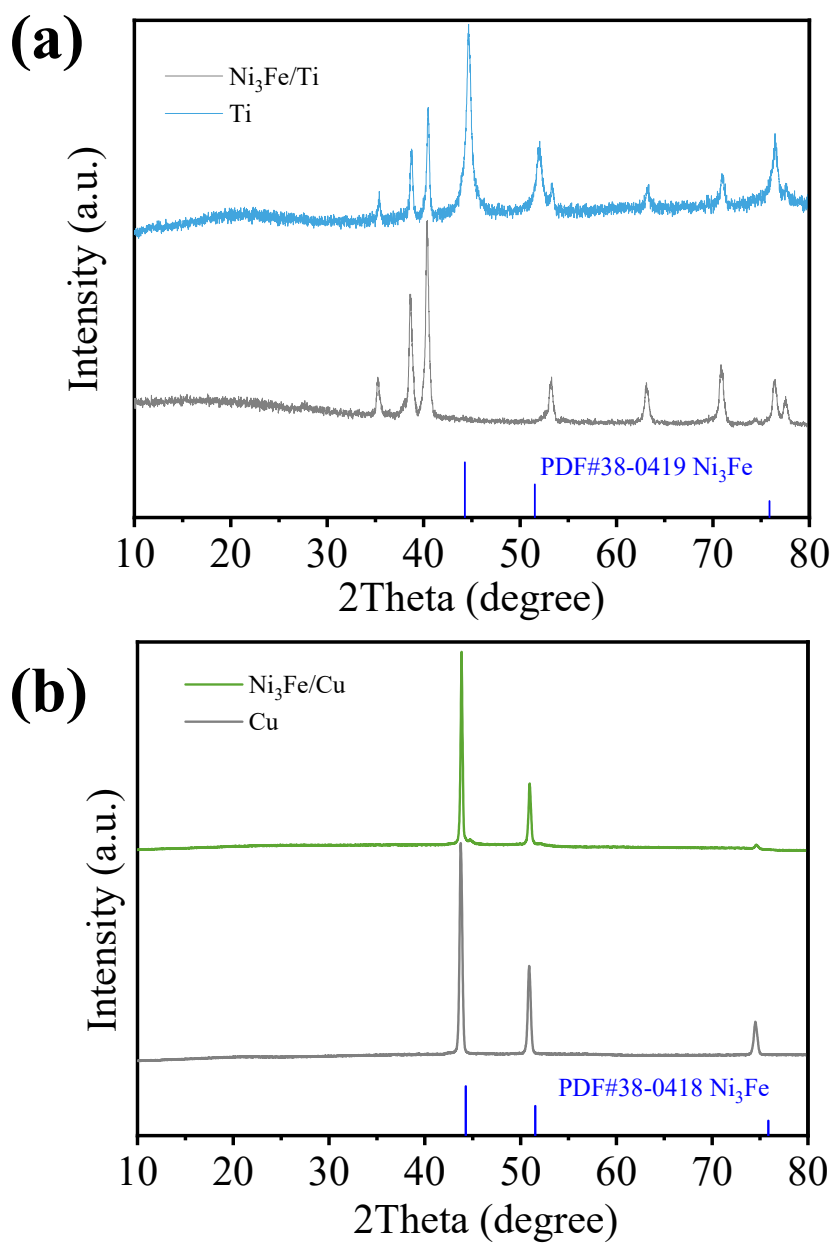

Fig S2. XRD patterns of Ni<sub>3</sub>Fe sample on (a) Ti and (b) Cu substrates.

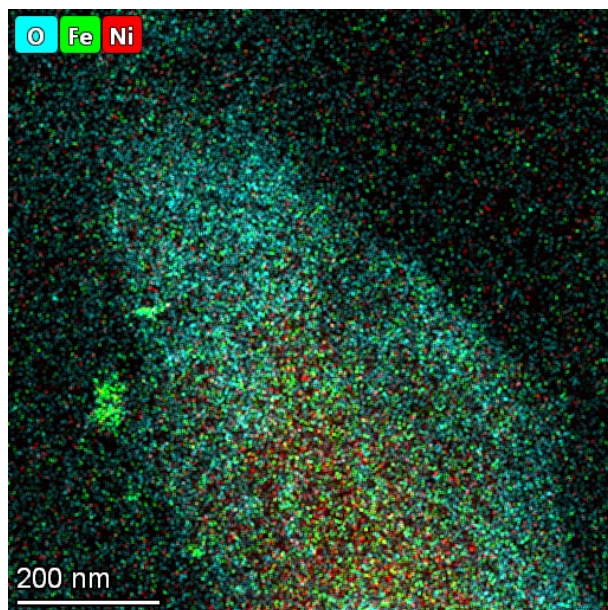

**Fig S3.** Elemental mapping image of Ni<sub>3</sub>Fe/CC.

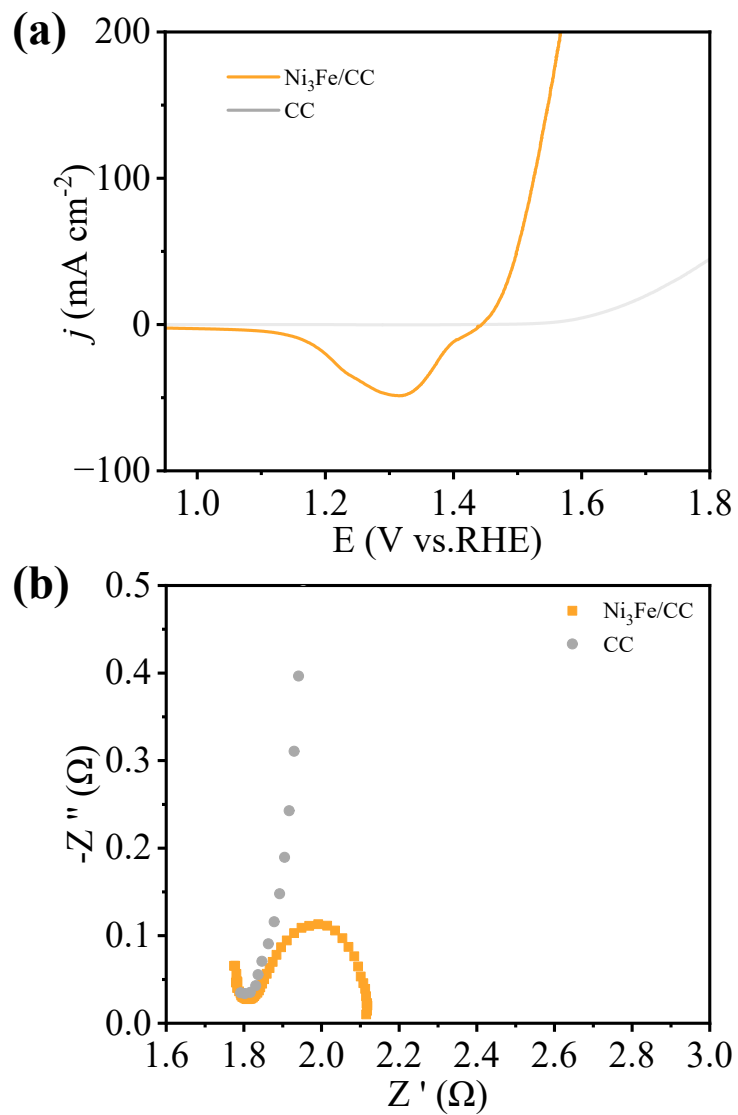

**Fig S4.** (a) LSV curves and (b) EIS of  $\text{Ni}_3\text{Fe}$  sample on CC substrate.

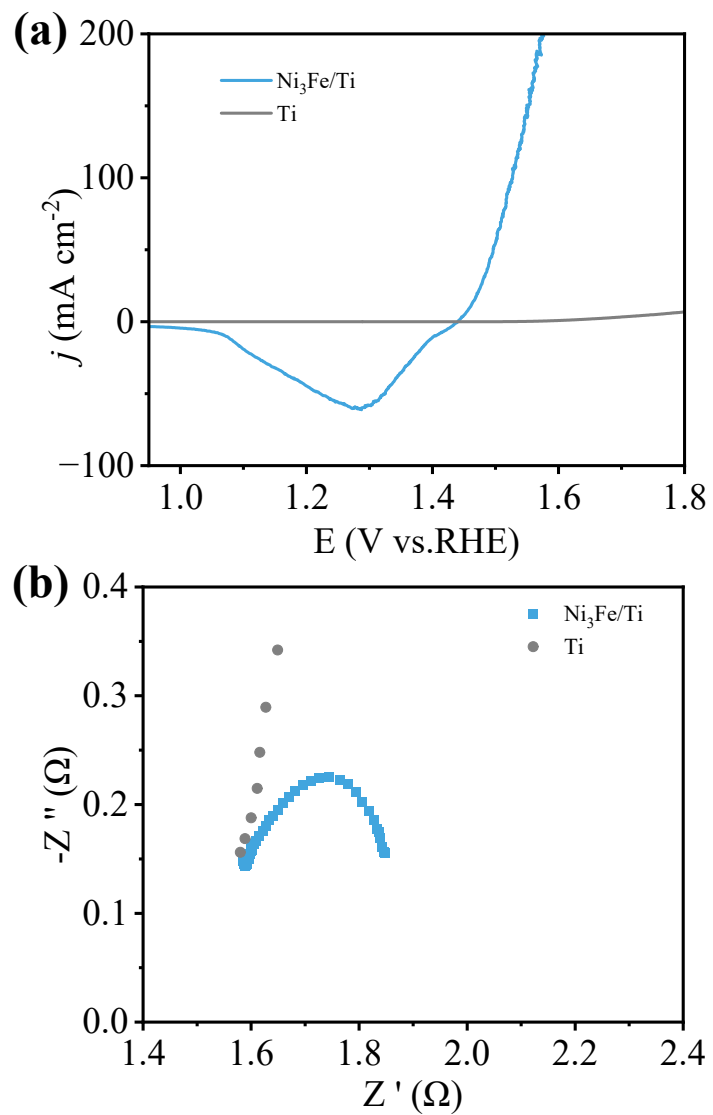

**Fig S5.** (a) LSV curves and (b) EIS of Ni<sub>3</sub>Fe sample on Ti substrate.

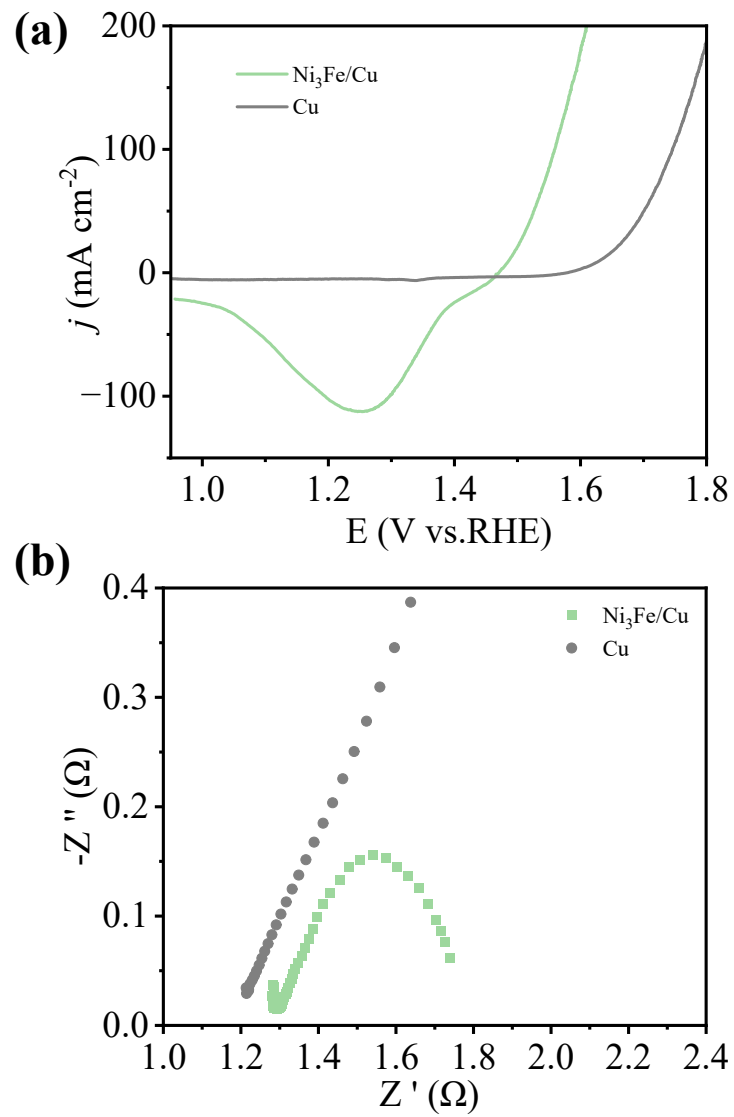

**Fig S6.** (a) LSV curves and (b) EIS of Ni<sub>3</sub>Fe sample on Cu substrate.

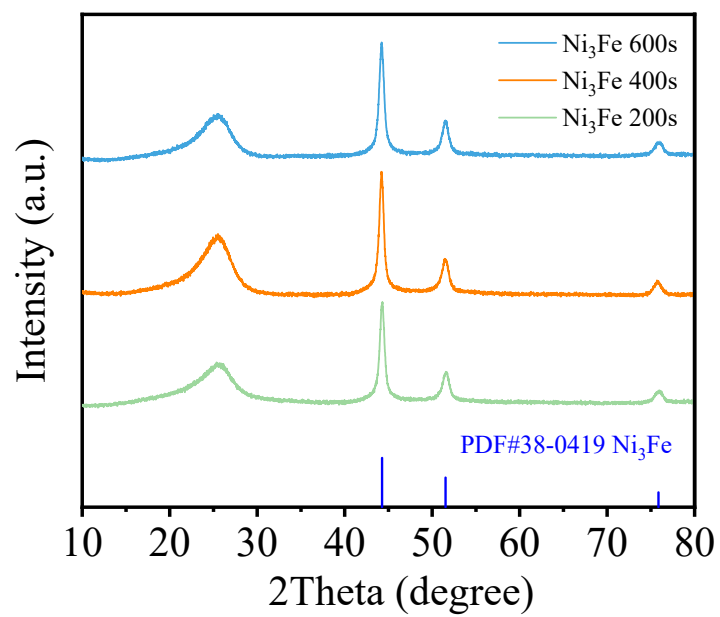

**Fig S7.** XRD patterns of  $\text{Ni}_3\text{Fe}/\text{CC}$  samples prepared with different electrodeposition times.

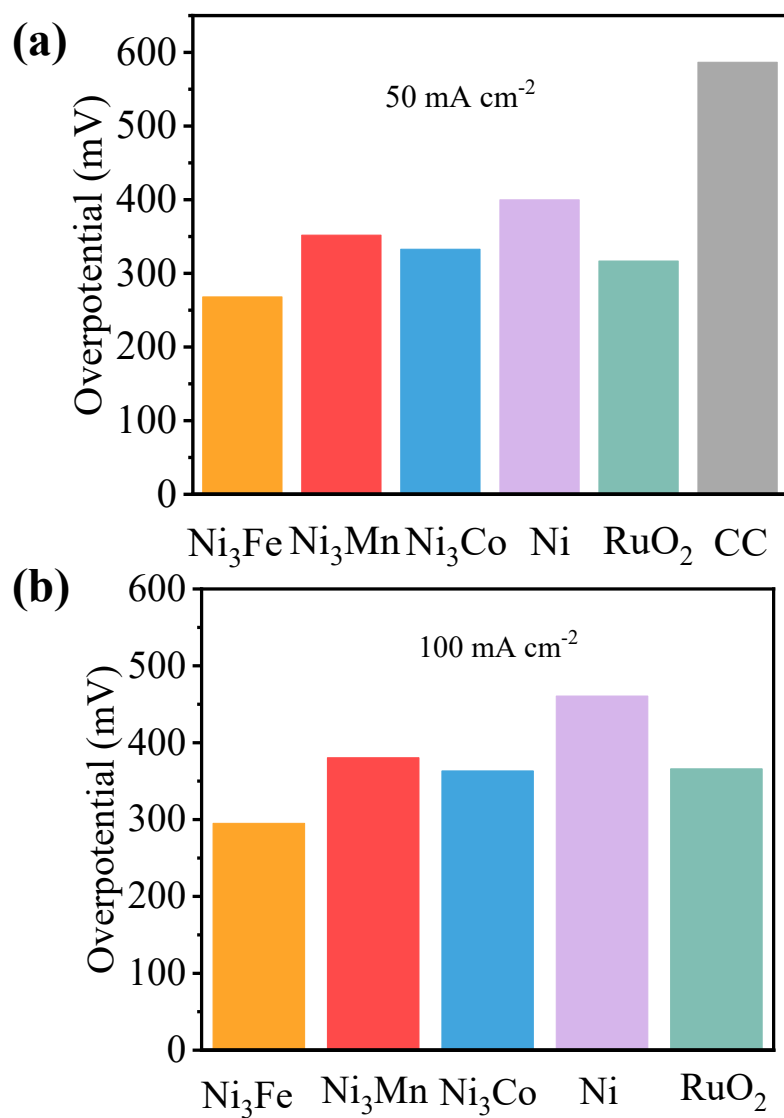

**Fig S8.** Overpotentials of Ni<sub>3</sub>Fe/CC, Ni<sub>3</sub>Mn/CC, Ni<sub>3</sub>Co/CC, Ni/CC, CC and RuO<sub>2</sub> electrodes at current densities of (a) 50 mA·cm<sup>-2</sup> and (b) 100 mA·cm<sup>-2</sup>

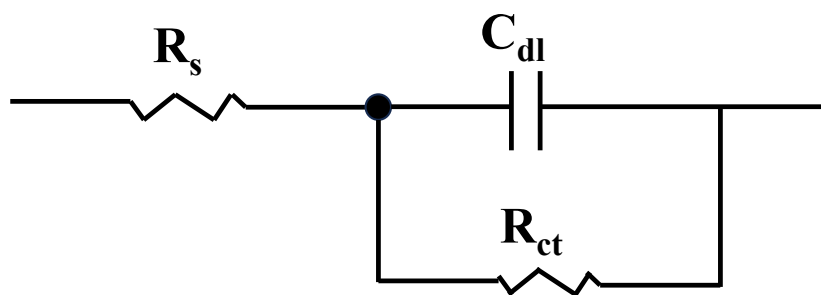

**Fig S9.** Schematic of the equivalent circuit used for electrochemical impedance spectroscopy.

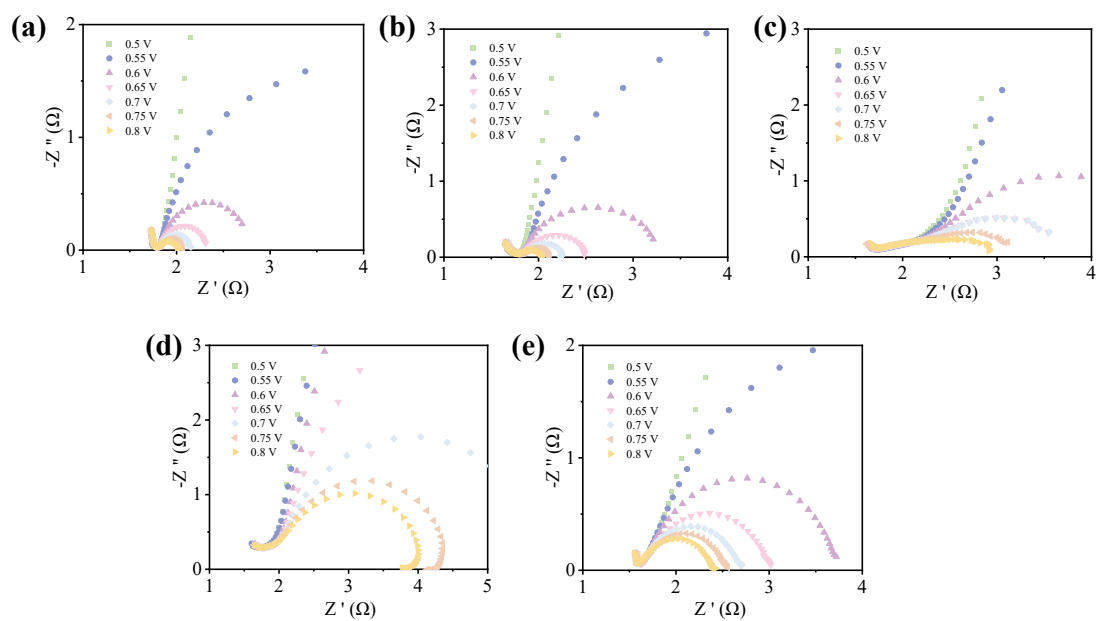

**Fig S10.** The Nyquist plots of (a)  $\text{Ni}_3\text{Mn}/\text{CC}$ , (b)  $\text{Ni}_3\text{Co}/\text{CC}$ , (c)  $\text{Ni}/\text{CC}$ , (d)  $\text{CC}$  and (e)  $\text{RuO}_2$  electrodes at various potentials.

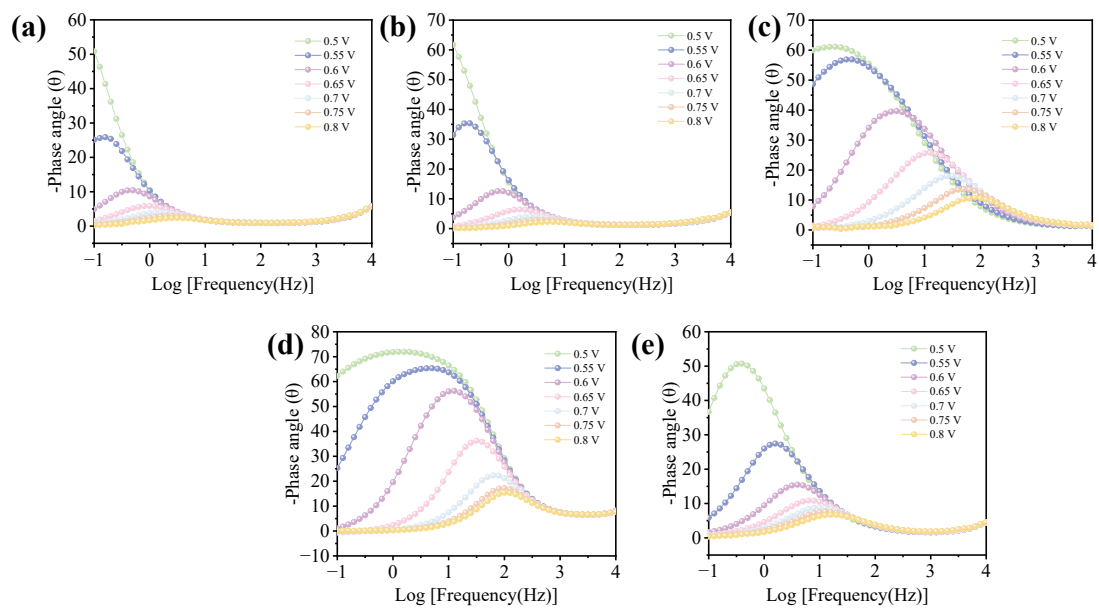

**Fig S11.** Bode phase angle plots of (a) Ni<sub>3</sub>Mn/CC, (b) Ni<sub>3</sub>Co/CC, (c) Ni/CC, (d) CC and (e) RuO<sub>2</sub> electrodes at various potentials.

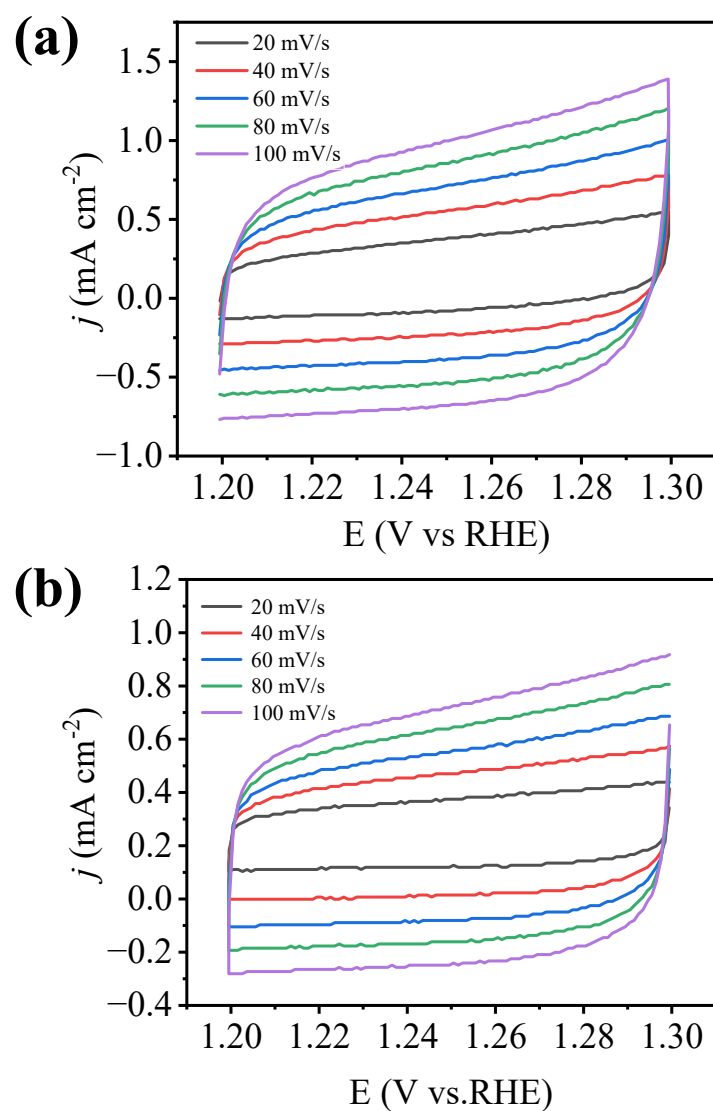

**Fig S12.** CV curves of Ni<sub>3</sub>Fe/CC samples at different scan rates from 20 to 100 mV s<sup>-1</sup> in (a) 1 M KOH and (b) 1 M KOH + 0.5 M NaCl electrolytes.

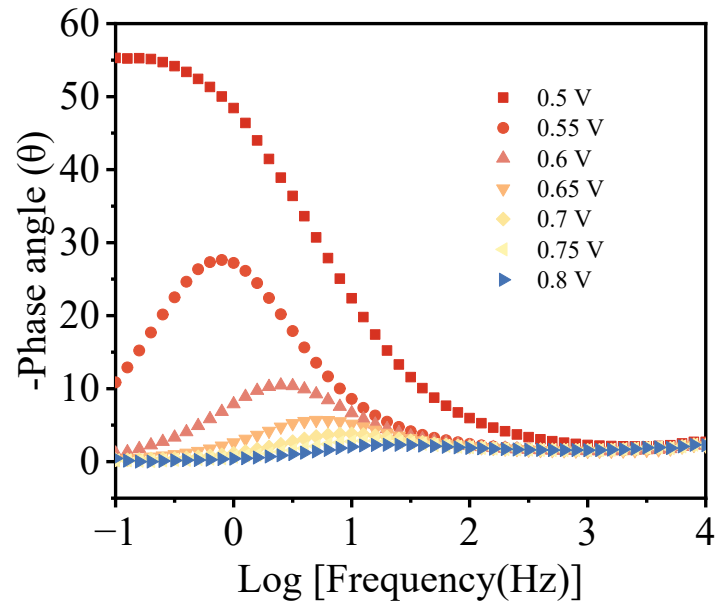

**Fig S13.** Bode phase angle plots of Ni<sub>3</sub>Fe/CC sample in 1 M KOH + 0.5 M NaCl electrolytes.

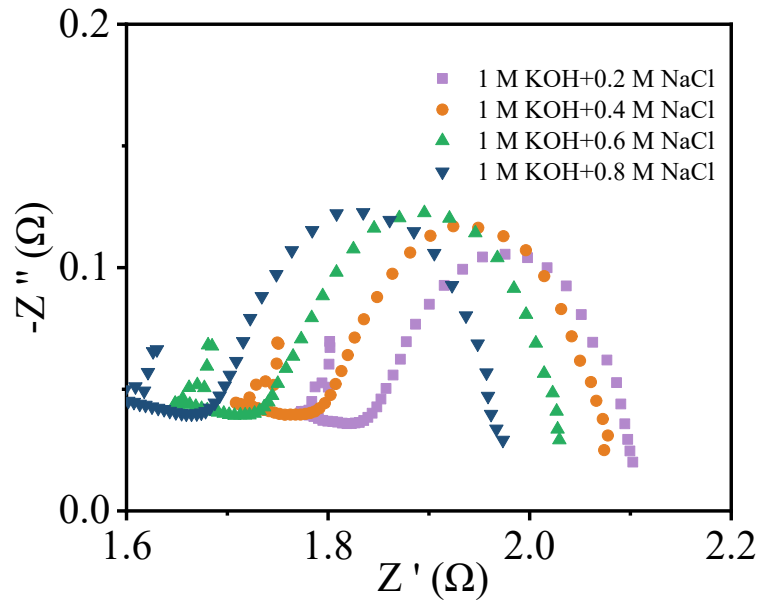

**Fig S14.** EIS of Ni<sub>3</sub>Fe/CC sample in different Cl<sup>-</sup> concentrations (0.2, 0.4, 0.6, 0.8 M).

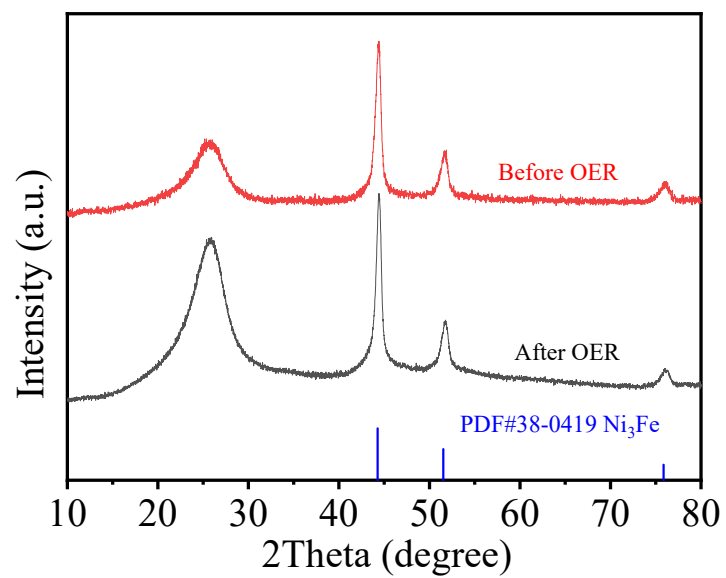

**Fig S15.** XRD patterns of the Ni<sub>3</sub>Fe/CC before and after 500 h stability test.

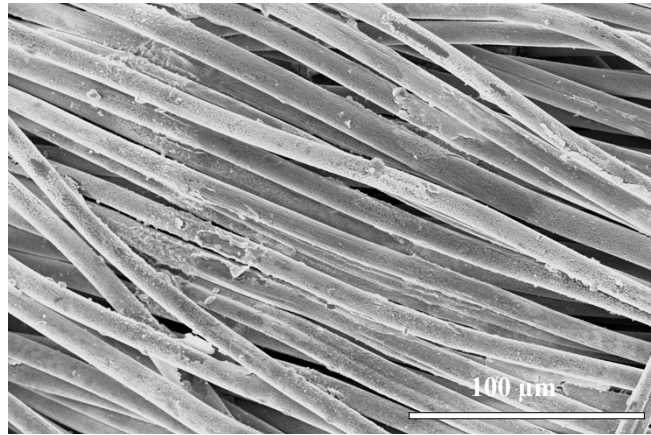

**Fig S16.** SEM image of Ni<sub>3</sub>Fe/CC after 500 h stability test.

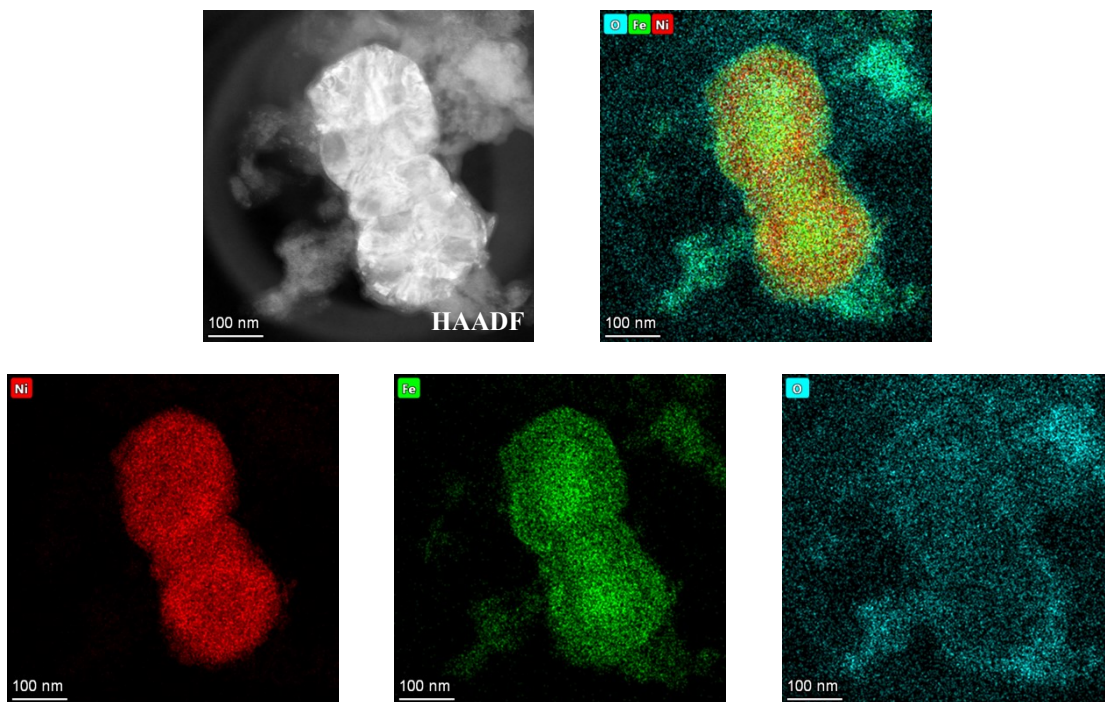

**Fig S17.** HR-TEM images and elemental mapping images of Ni, Fe and O in Ni<sub>3</sub>Fe/CC after OER.

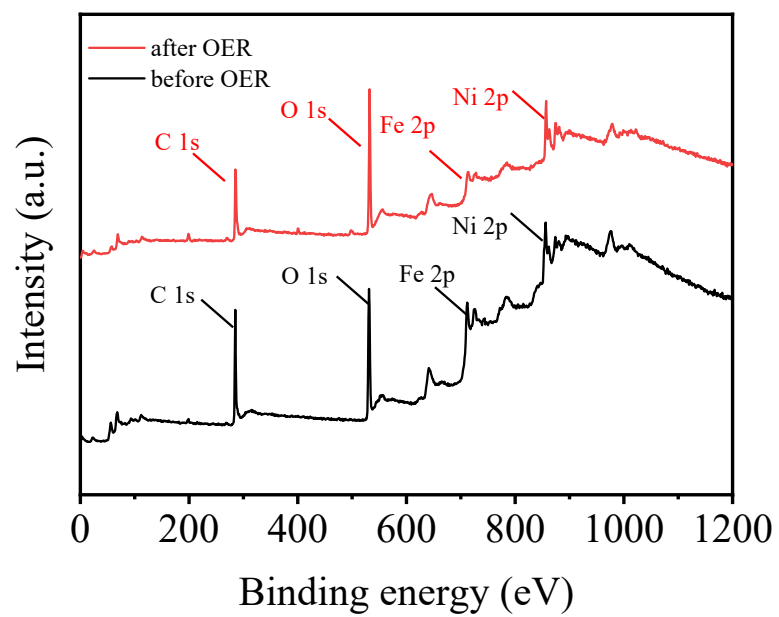

**Fig S18.** The XPS spectra of Ni<sub>3</sub>Fe/CC before and after OER.

### 3. Supplementary Table

**Table S1.** Comparison of the OER performance of Ni<sub>3</sub>Fe/CC catalyst with other reported OER catalysts

| Catalyst                                            | Electrolyte | Substrate | Current density (mA cm <sup>-2</sup> ) | Overpotential (mV) | Ref       |
|-----------------------------------------------------|-------------|-----------|----------------------------------------|--------------------|-----------|
| Ni-MOF/NF-Fe                                        | 1 M KOH     | NF        | 100                                    | 246                | 1         |
| NiO                                                 | 1 M KOH     | G P       | 10                                     | 316                | 2         |
| Gd, Fe-NiO                                          | 1 M KOH     | GCE       | 10                                     | 227                | 3         |
| NiS                                                 | 1 M KOH     | GCE       | 10                                     | 320                | 4         |
| Cr-FeNi LDH                                         | 1 M KOH     | ESS       | 10                                     | 280                | 5         |
| $\alpha/\beta$ -NiMoO <sub>4</sub>                  | 1 M KOH     | NF        | 10                                     | 270                | 6         |
| a-Ru+NiMoOx                                         | 1 M KOH     | GC        | 10                                     | 220                | 7         |
| r <sub>GO</sub> /Ni <sub>2</sub> P                  | 1 M KOH     | GCE       | 10                                     | 283                | 8         |
| Ni <sub>32</sub> Fe                                 | 1 M KOH     | GCE       | 10                                     | 291                | 9         |
| NiFeCoCrW <sub>0.2</sub>                            | 1 M KOH     | SSWE      | 10                                     | 220                | 10        |
| NiO/NiFe <sub>2</sub> O <sub>4</sub>                | 1 M KOH     | GCE       | 10                                     | 302                | 11        |
| Ce-NiCo <sub>2</sub> O <sub>4</sub>                 | 1 M KOH     | GCE       | 10                                     | 270                | 12        |
| Ni <sub>3</sub> N/NF                                | 1 M KOH     | NF        | 10                                     | 316                | 13        |
| NiFeOOH                                             | 1 M KOH     | GCE       | 10                                     | 347                | 14        |
| Vo- $\alpha$ -Fe <sub>2</sub> O <sub>3</sub> @AuNSs | 1 M KOH     | GCE       | 10                                     | 282                | 15        |
| FeCoNiMnCu                                          | 1 M KOH     | CNTs      | 10                                     | 293                | 16        |
| Fe-NiS <sub>2</sub> @NaBH <sub>4</sub>              | 1 M KOH     | NF        | 10                                     | 233                | 17        |
| FeP                                                 | 1 M KOH     | GPC       | 10                                     | 278                | 18        |
| NiFeS-2                                             | 1 M KOH     | GF        | 10                                     | 290                | 19        |
| NiFe/W <sub>0.3</sub> C                             | 1 M KOH     | NC        | 10                                     | 290                | 20        |
| Ni <sub>3</sub> Fe/CC                               | 1 M KOH     | CC        | 10                                     | 234                | This work |

#### 4. References

1. L. Feng, W. Chen, B. Ma, W. Xie, Y. Xia, Z. Zhou, J. Su, R. Zhong and R. Zou, *Advanced Functional Materials*, 2026, 36, e18095.
2. L. Bruno, M. Scuderi, F. Priolo and S. Mirabella, *Sustainable Energy & Fuels*, 2022, 6, 4498-4505.
3. Y. Wang, Y. Liu, S. Liu, Y. Qin, J. Liu, X. Jia, Q. Jiang, X. Wang, Y. Zhao, L. Liu, H. Liu, H. Zhao, Y. Jiang, D. Liang, H. Wu, B. Jia, X. Qu, H. Li and M. Qin, *Advanced Functional Materials*, 2025, 35, 2500118.
4. P. Luo, H. Zhang, L. Liu, Y. Zhang, J. Deng, C. Xu, N. Hu and Y. Wang, *ACS Applied Materials & Interfaces*, 2017, 9, 2500-2508.
5. Y. Lv, X. Deng, J. Ding and Y. Zhou, *Scientific Reports*, 2024, 14, 902.
6. J. Zhu, Q. Zhou, L. Wang, W. Zhou, M. Chen, X. Liu, D. Gao and D. Chao, *Advanced Energy Materials*, 2024, 14, 2304554.
7. J. Li, Y. Zhu, C. Li, Q. Zhang, J. Rong, S. Guo, N. Alonso-Vante, L. Yang, M.-H. Yeh, W.-H. Huang, X. Yu, H. Cheng and J. Ma, *Nature Communications*, 2025, 16, 8827.
8. P. Li, R. Chen, S. Tian and Y. Xiong, *ACS Sustainable Chemistry & Engineering*, 2019, 7, 9566-9573.
9. M. Yu, G. Moon, E. Bill and H. Tüysüz, *ACS Applied Energy Materials*, 2019, 2, 1199-1209.
10. T. Zhang, H.-F. Zhao, Z.-J. Chen, Q. Yang, N. Gao, L. Li, N. Luo, J. Zheng, S.-D. Bao, J. Peng, X. Peng, X.-W. Liu and H.-B. Yu, *Nature Communications*, 2025, 16, 3327.
11. G. Liu, X. Gao, K. Wang, D. He and J. Li, *International Journal of Hydrogen Energy*, 2016, 41, 17976-17986.
12. X. Wang, J. Hu, T. Lu, H. Wang, D. Sun, Y. Tang, H. Li and G. Fu, *Angewandte Chemie International Edition*, 2025, 64, e202415306.
13. M. S. Metaxa, I. Vamvasakis and G. S. Armatas, *Small*, 2026, 22, e13136.
14. Z. Wang, S. Han, Y. Zhang and Y. Wang, *Fuel*, 2024, 357, 129946.
15. H. Zhang, P. Li, H. Zhou, J. Xu, Q. Jiang, J. H. L. Hadden, Y. Wang, M. Wang, S. Chen, F. Xie and D. J. Riley, *Nano Energy*, 2022, 94, 106968.
16. P. Guo, D. Liu, H. Yang, P. Chen, M. Zhang, X. Ding, C. Zheng, H. Pan and R. Wu, *ACS Nano*, 2026, 20, 4152-4165.
17. G. Xiong, H. Deng, Y. Chen, Q. Wu, X. Zhou and W. Yao, *ACS Catalysis*, 2025, 15, 13948-13957.
18. J. Masud, S. Umapathi, N. Ashokaan and M. Nath, *Journal of Materials Chemistry A*, 2016, 4, 9750-9754.
19. B.-Q. Li, S.-Y. Zhang, C. Tang, X. Cui and Q. Zhang, *Small*, 2017, 13, 1700610.
20. E. Jang, J. Cho, J. Kim and J. Kim, *Applied Surface Science*, 2024, 663, 160201.
